# Supplementary material for: Prevalence of Salmonella in Eggs from Conventional and Cage-Free Egg Production Systems and the Role of Consumers in Reducing Household Contamination
Source: MDPI journal article supplement (doi:10.3390/foods12234300), 2023-11-28
Supplement: s1 [file s1]

## Supplementary Table

**Table S1.** Demographic characteristics of survey participants ( $n = 385$ ).

| Question                                                | Answer      | N (%)      |
|---------------------------------------------------------|-------------|------------|
| 1. Gender                                               | Female      | 318 (82.6) |
|                                                         | Male        | 64 (16.6)  |
|                                                         | Other       | 3 (0.8)    |
| 2. Age                                                  | 18–29 years | 98 (25.3)  |
|                                                         | 30–59 years | 205 (53.2) |
|                                                         | ≥ 60 years  | 82 (21.4)  |
| 3. Do you study/work in the food handling/safety field? | Yes         | 65 (16.9)  |
|                                                         | No          | 320 (83.1) |
